# Supplementary material for: Natural Pigments of Anthocyanin and Betalain for Coloring Soy-Based Yogurt Alternative
Source: PubMed Central journal article supplement (PMC7353562; doi:10.3390/foods9060771), 2020-06-11
Supplement: foods-09-00771-s001.pdf [file foods-09-00771-s001.pdf]

## Supplementary Material

# Natural Pigments of Anthocyanin and Betalain for Coloring Soy-Based Yogurt Alternative

Sandra Dias <sup>1</sup>, Elisabete M. S. Castanheira <sup>2</sup>, A. Gil Fortes <sup>1</sup>, David M. Pereira <sup>3</sup> and M. Sameiro T. Gonçalves <sup>1\*</sup>

<sup>1</sup> Centre of Chemistry, University of Minho, Campus of Gualtar, 4710-057 Braga, Portugal; sandraisdias@hotmail.com (S.D.); gilf@quimica.uminho.pt (A.G.F.)

<sup>2</sup> Centre of Physics, University of Minho, Campus of Gualtar, 4710-057 Braga, Portugal; ecoutinho@fisica.uminho.pt

<sup>3</sup> REQUIMTE/LAQV, Laboratory of Pharmacognosy, Department of Chemistry, Faculty of Pharmacy, University of Porto, R. Jorge Viterbo Ferreira, 228, 4050-313 Porto, Portugal; dpereira@ff.up.pt

\* Correspondence: msameiro@quimica.uminho.pt; Tel.: +351253604372

Received: date; Accepted: date; Published: date

**Table S1.** Variations in color index of soy-based yogurt alternative during 21 days of storage. Soy-based yogurt alternative – SY; B – Red beetroot; O – Opuntia; H - Hibiscus; R - Red radish; Ei - Ethanol injection method; Fh - thin film hydration method. Amounts of extracts (mg) are given in brackets.

| Sample                | Lab index during storage |       |        |         |       |       |         |       |       |          |       |       |          |       |       |
|-----------------------|--------------------------|-------|--------|---------|-------|-------|---------|-------|-------|----------|-------|-------|----------|-------|-------|
|                       | 0 day                    |       |        | 1st day |       |       | 7th day |       |       | 14th day |       |       | 21st day |       |       |
|                       | L*                       | a*    | b*     | L*      | a*    | b*    | L*      | a*    | b*    | L*       | a*    | b*    | L*       | a*    | b*    |
| SY                    | 80.98                    | -1.87 | 2.35   | 83.10   | -1.61 | 3.76  | 81.15   | -1.64 | 1.31  | 81.31    | -1.24 | 1.41  | 79.88    | -1.15 | 0.56  |
| SY+B<br>(4.5)         | 70.98                    | 7.84  | -4.81  | 71.71   | 6.70  | -5.02 | 72.09   | 5.72  | -4.40 | 72.17    | 3.42  | -2.92 | 72.84    | 0.71  | -0.63 |
| SY+ O<br>(4.0)        | 71.44                    | 5.58  | -5.78  | 74.65   | 5.31  | -4.62 | 73.20   | 3.44  | -4.33 | 73.86    | 1.68  | -2.94 | 74.31    | 0.82  | -1.81 |
| SY+H<br>(15.5)        | 71.51                    | 3.85  | 0.14   | 73.46   | 2.41  | 1.92  | 73.83   | 1.62  | 2.66  | 73.43    | 1.15  | 3.40  | 72.22    | 0.84  | 5.24  |
| SY+R<br>(32.5)        | 69.43                    | 7.45  | 0.61   | 68.57   | 9.78  | -0.68 | 68.88   | 8.95  | -0.16 | 67.66    | 9.01  | -0.60 | 65.17    | 9.86  | 0.31  |
| SY+B Ei<br>(7.9)      | 76.61                    | -0.98 | -1.31  | 76.43   | -1.07 | -1.87 | 76.70   | -1.14 | -1.61 | 75.24    | -1.17 | -2.07 | 74.82    | -1.31 | -1.89 |
| SY+O<br>Ei (8.29)     | 75.48                    | -1.32 | -1.47  | 77.76   | -1.22 | -0.94 | 76.47   | -1.21 | -1.74 | 75.60    | -1.21 | -1.98 | 74.68    | -1.27 | -2.12 |
| SY+H<br>Ei (7.91)     | 75.28                    | -1.78 | -1.21  | 74.80   | -1.58 | -1.82 | 75.15   | -1.57 | -1.77 | 74.77    | -1.33 | -2.12 | 75.31    | -1.35 | -1.78 |
| SY+R Ei<br>(7.98)     | 74.44                    | -1.47 | -1.96  | 74.99   | -1.23 | -2.53 | 74.61   | -1.27 | -2.56 | 73.62    | -1.17 | -2.97 | 72.27    | -1.19 | -2.82 |
| SY+B<br>Fh<br>(21.35) | 67.52                    | 7.19  | -5.54  | 59.01   | 2.88  | -6.78 | 52.30   | 0.76  | -6.72 | 59.69    | 1.51  | -3.56 | 70.01    | -0.48 | 2.58  |
| SY+O<br>Fh<br>(20.52) | 57.50                    | 9.60  | -10.51 | 48.78   | 4.61  | -8.62 | 39.25   | 1.29  | -4.59 | 39.81    | 1.53  | -3.33 | 69.56    | 3.52  | 6.33  |
| SY+H<br>Fh<br>(20.85) | 71.09                    | -1.07 | -1.65  | 65.92   | -1.28 | -3.35 | 57.16   | -1.45 | -5.18 | 50.43    | -0.76 | -4.78 | 62.17    | 1.74  | -0.08 |
| SY+R<br>Fh<br>(21.05) | 63.62                    | -0.77 | -3.67  | 48.50   | -0.51 | -5.74 | 39.92   | -0.30 | -3.01 | 35.77    | -0.04 | -2.00 | 77.33    | 1.42  | 3.25  |
